# Supplementary material for: Overcoming Cabbage Crossing Incompatibility by the Development and Application of Self-Compatibility-QTL- Specific Markers and Genome-Wide Background Analysis
Source: Front Plant Sci. 2019 Feb 26;10:189. doi: 10.3389/fpls.2019.00189 (PMC6399166; doi:10.3389/fpls.2019.00189)
Supplement: Table S5 — Information on agronomic traits. [file Table_5.XLS]

## Sheet: S5
Information on agronomic traits
Individuals namber	Head weigh （kg）	Head length (cm)	Core length (cm)
96-100-1	0.67	13	5.5
96-100-2	0.75	13.5	5
96-100-3	0.65	13.5	5.5
SC96-100-1	0.6	12.5	5
SC96-100-2	0.67	13	5
SC96-100-3	0.75	13	5
SC96-100-4	0.75	13.5	6
SC96-100-5	0.65	13	6
SC96-100-6	0.7	13	6.5
SC96-100-7	0.65	12.5	3.5
SC96-100-8	0.65	14	5
SC96-100-9	0.8	14.5	5
SC96-100-10	0.7	12.5	5.5
SC96-100-11	0.75	13	6
SC96-100-12	0.65	14	5.5
SC96-100-13	0.6	14	5
SC96-100-14	0.75	14	5.5
SC96-100-15	0.75	13	5.5
SC96-100-16	0.6	11.5	5
SC96-100-17	0.6	11	4
SC96-100-18	0.75	12	6
SC96-100-19	0.65	12	5
SC96-100-20	0.65	12.5	5
06-88-1	1.05	13.5	6.5
06-88-2	0.95	14	6
06-88-3	1	13.5	5.5
SC06-88-1	1	13.5	6.5
SC06-88-2	1	13.5	6
SC06-88-3	1.1	14	7.5
SC06-88-4	1	16	6
SC06-88-5	1	13.5	5.5
SC06-88-6	1.1	12.5	6
SC06-88-7	0.9	14.5	6
SC06-88-8	1.15	15	5.5
SC06-88-9	1.1	15.5	5.5
SC06-88-10	1.15	14	6
SC06-88-11	1.1	14	5.5
SC06-88-12	1.15	14	6
SC06-88-13	1.15	15	5.5
SC06-88-14	1	13	5.5
SC06-88-15	1.1	14	6
SC06-88-16	1.1	13	5.5
SC06-88-17	1.2	13.5	5.5
SC06-88-18	1.15	14	6
SC06-88-19	1.1	14	5.5
SC06-88-20	1.15	15	5.5
